# Supplementary material for: Ex vivo investigation on internal tunnel approach/internal resin infiltration and external nanosilver-modified resin infiltration of proximal caries exceeding into dentin
Source: PubMed Central journal article supplement (PMC6986723; doi:10.1371/journal.pone.0228249), 2020-01-28
Supplement: pone.0228249.s001.pdf [file pone.0228249.s001.pdf]

| Tooth | PM/M | ICDAS | AgNPs | Pixel | Pixel width | Lesion width | B%         | RITC% | FITC% |      |
|-------|------|-------|-------|-------|-------------|--------------|------------|-------|-------|------|
| 1     | 4    | 4     | 3     | 1     | 7736660     | 0,075076     | 580837,486 | 0,56  | 0,32  | 0,75 |
| 7     | 4    | 4     | 3     | 1     | 12310877    | 0,075076     | 924251,402 | 0,88  | 0,15  | 0,57 |
| 15    | 4    | 4     | 2     | 0     | 5440223     | 0,075076     | 408430,182 | 0,63  | 0,1   | 0,27 |
| 17    | 4    | 4     | 3     | 1     | 15018636    | 0,075076     | 1127539,12 | 0,63  | 0,19  | 0,41 |
| 20    | 4    | 4     | 2     | 0     | 9578425     | 0,075076     | 719109,835 | 0,76  | 0,13  | 0,53 |
| 28    | 4    | 4     | 3     | 0     | 8187091     | 0,075076     | 614654,044 | 0,9   | 0,31  | 0,89 |
| 32    | 4    | 4     | 2     | 1     | 11262853    | 0,075076     | 845569,952 | 0,68  | 0,23  | 0,71 |
| 44    | 4    | 4     | 2     | 1     | 16675770    | 0,075076     | 1251950,11 | 0,72  | 0,15  | 0,48 |
| 51    | 4    | 4     | 3     | 0     | 6343914     | 0,075076     | 476275,687 | 0,73  | 0,11  | 0,44 |
| 53    | 4    | 4     | 2     | 1     | 11909207    | 0,075076     | 894095,625 | 0,48  | 0,1   | 0,27 |
| 57    | 4    | 4     | 3     | 0     | 4303365     | 0,075076     | 323079,431 | 0,46  | 0,12  | 0,31 |
| 68    | 4    | 4     | 2     | 0     | 6668875     | 0,075076     | 500672,46  | 0,6   | 0,08  | 0,42 |
| 73    | 4    | 4     | 3     | 1     | 8662091     | 0,075076     | 650315,144 | 0,62  | 0,48  | 0,86 |
| 74    | 4    | 4     | 2     | 1     | 19728164    | 0,075076     | 1481111,64 | 0,53  | 0,07  | 0,31 |
| 78    | 4    | 4     | 2     | 0     | 7878798     | 0,075076     | 591508,639 | 0,75  | 0,3   | 0,55 |
| 79    | 4    | 4     | 2     | 1     | 13647958    | 0,075076     | 1024634,09 | 0,53  | 0,16  | 0,42 |
| 80    | 4    | 4     | 2     | 1     | 3451299     | 0,075076     | 259109,724 | 0,72  | 0,11  | 0,59 |
| 81    | 4    | 4     | 3     | 0     | 4065309     | 0,075076     | 305207,138 | 0,61  | 0,12  | 0,56 |
| 105   | 4    | 4     | 2     | 1     | 8767966     | 0,075076     | 658263,815 | 0,57  | 0,14  | 0,24 |
| 107   | 4    | 4     | 3     | 0     | 8943096     | 0,075076     | 671411,875 | 0,55  | 0,11  | 0,43 |
| 112   | 4    | 4     | 3     | 1     | 9245715     | 0,075076     | 694131,299 | 0,75  | 0,16  | 0,37 |
| 115   | 4    | 4     | 3     | 0     | 11990197    | 0,075076     | 900176,03  | 0,86  | 0,25  | 0,71 |
| 2     | 5    | 5     | 3     | 1     | 6413358     | 0,075076     | 481489,265 | 0,89  | 0,73  | 0,86 |
| 4     | 5    | 5     | 2     | 1     | 13673470    | 0,075076     | 1026549,43 | 0,85  | 0,12  | 0,44 |
| 25    | 5    | 5     | 3     | 0     | 12105409    | 0,075076     | 908825,686 | 0,85  | 0,24  | 0,59 |
| 26    | 5    | 5     | 3     | 1     | 14202652    | 0,075076     | 1066278,3  | 0,71  | 0,26  | 0,59 |
| 41    | 5    | 5     | 2     | 0     | 3461304     | 0,075076     | 259860,859 | 0,55  | 0,21  | 0,39 |
| 45    | 5    | 5     | 3     | 1     | 5028372     | 0,075076     | 377510,056 | 0,78  | 0,24  | 0,69 |
| 46    | 5    | 5     | 2     | 1     | 6607699     | 0,075076     | 496079,61  | 0,91  | 0,34  | 0,56 |
| 51    | 5    | 5     | 3     | 1     | 10002338    | 0,075076     | 750935,528 | 0,64  | 0,18  | 0,47 |
| 53    | 5    | 5     | 2     | 1     | 6370040     | 0,075076     | 478237,123 | 0,86  | 0,22  | 0,6  |
| 55    | 5    | 5     | 3     | 1     | 7827190     | 0,075076     | 587634,116 | 0,97  | 0,9   | 0,94 |
| 60    | 5    | 5     | 3     | 0     | 11916162    | 0,075076     | 894617,778 | 0,82  | 0,38  | 0,58 |
| 68    | 5    | 5     | 2     | 1     | 5398623     | 0,075076     | 405307,02  | 0,93  | 0,35  | 0,64 |
| 88    | 5    | 5     | 2     | 0     | 12467753    | 0,075076     | 936029,024 | 0,68  | 0,15  | 0,39 |
| 112   | 5    | 5     | 2     | 1     | 9733464     | 0,075076     | 730749,543 | 0,75  | 0,4   | 0,61 |
| 130   | 5    | 5     | 3     | 0     | 4595813     | 0,075076     | 345035,257 | 0,77  | 0,16  | 0,67 |
| 134   | 5    | 5     | 2     | 1     | 7958088     | 0,075076     | 597461,415 | 0,74  | 0,24  | 0,71 |
| 146   | 5    | 5     | 2     | 0     | 7506848     | 0,075076     | 563584,12  | 0,76  | 0,23  | 0,6  |
| 152   | 5    | 5     | 3     | 1     | 9033278     | 0,075076     | 678182,379 | 0,61  | 0,07  | 0,32 |
| 155   | 5    | 5     | 3     | 0     | 7748668     | 0,075076     | 581738,999 | 0,79  | 0,23  | 0,63 |
| 167   | 5    | 5     | 3     | 0     | 11125985    | 0,075076     | 835294,45  | 0,84  | 0,21  | 0,82 |
| 173   | 5    | 5     | 2     | 0     | 7471064     | 0,075076     | 560897,601 | 0,76  | 0,14  | 0,62 |

#### Legend

Tooth = Number of tooth  
 PM/M = Molar=4, Premolar=5  
 ICDAS = ICDAS 2=2, ICDAS 3=3  
 AgNPs = without nanosilver=0, with nanosilver=1  
 Lesion width square  $\mu\text{m}$   
 B% = Berberine (percentage)  
 RITC% = RITC (percentage)  
 FITC% = FITC (percentage)
